# Supplementary material for: Bacterial Community of Grana Padano PDO Cheese and Generical Hard Cheeses: DNA Metabarcoding and DNA Metafingerprinting Analysis to Assess Similarities and Differences
Source: MDPI journal article supplement (doi:10.3390/foods10081826), 2021-08-07
Supplement: s1 [file s1]

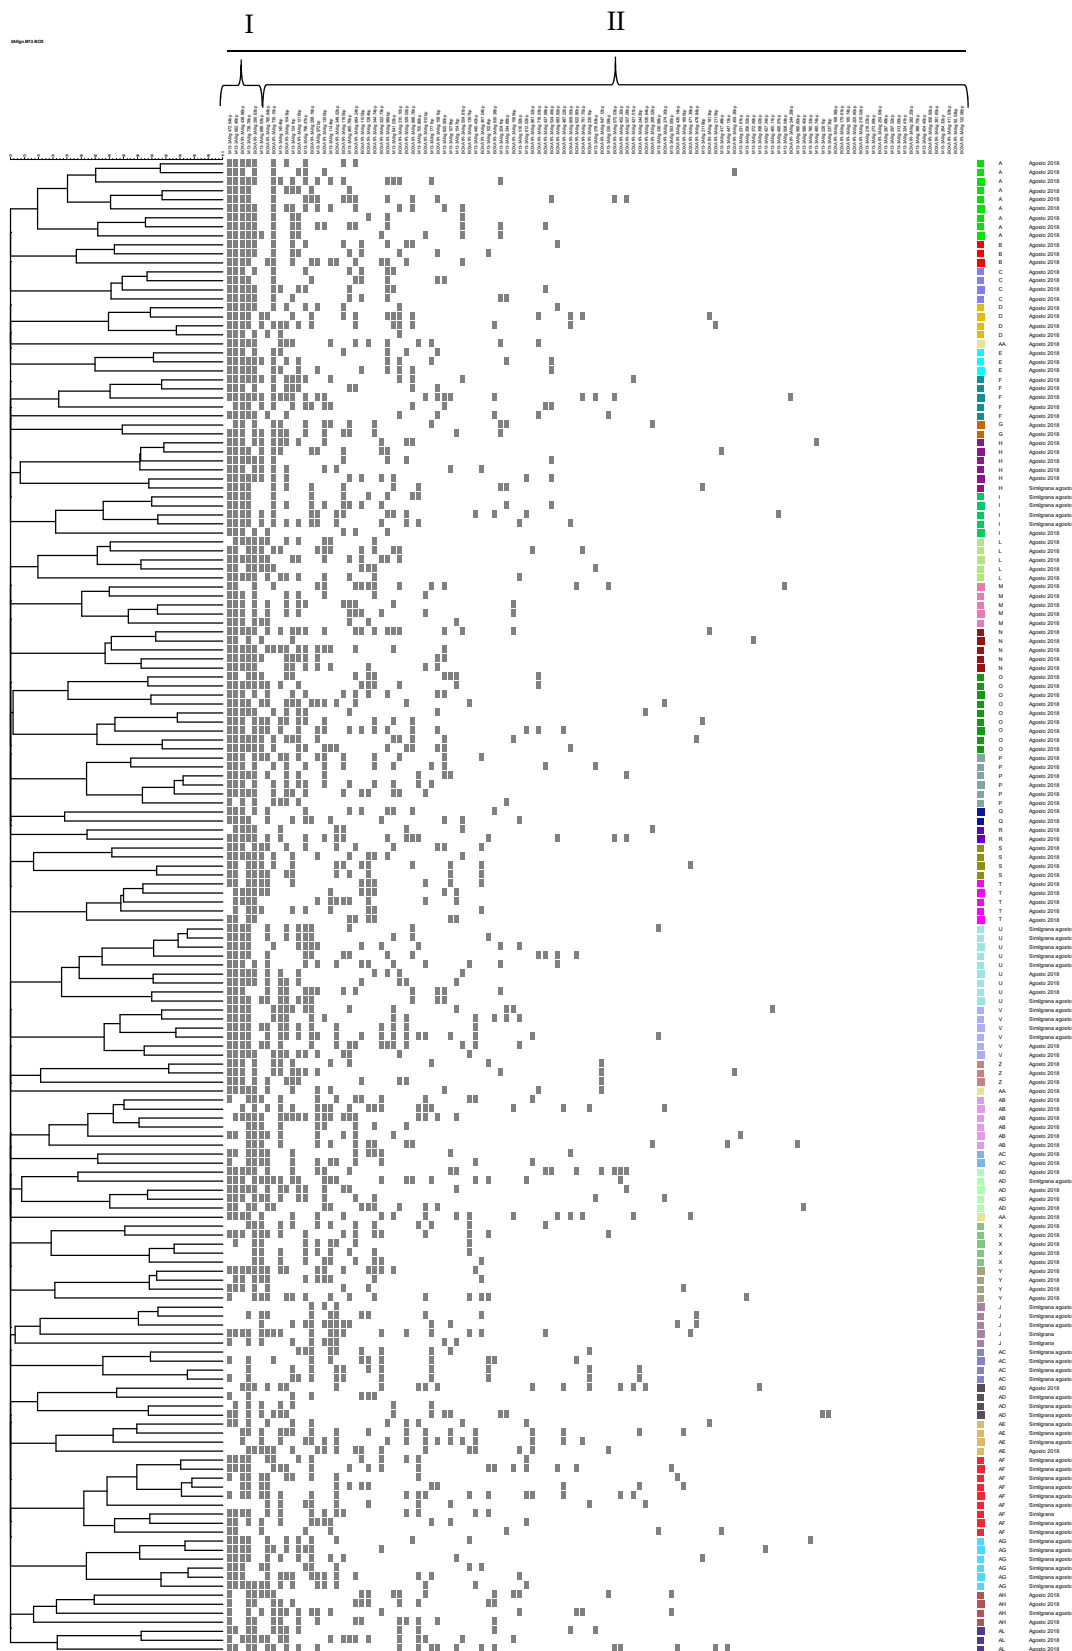

**Figure S2.** Band matching cluster analysis showing the relationship between Grana Padano and similar hard cheese samples and M13- / BOXA1R-RAPD-PCR bands. Right side: genotype color, genotype name, sample name, region of origin of the sample. Top side: representative bands across the samples. I = core community banding pattern; II = discriminating banding pattern.
