# Supplementary material for: Bacterial Community of Grana Padano PDO Cheese and Generical Hard Cheeses: DNA Metabarcoding and DNA Metafingerprinting Analysis to Assess Similarities and Differences
Source: MDPI journal article supplement (doi:10.3390/foods10081826), 2021-08-07
Supplement: s1 [file s1]

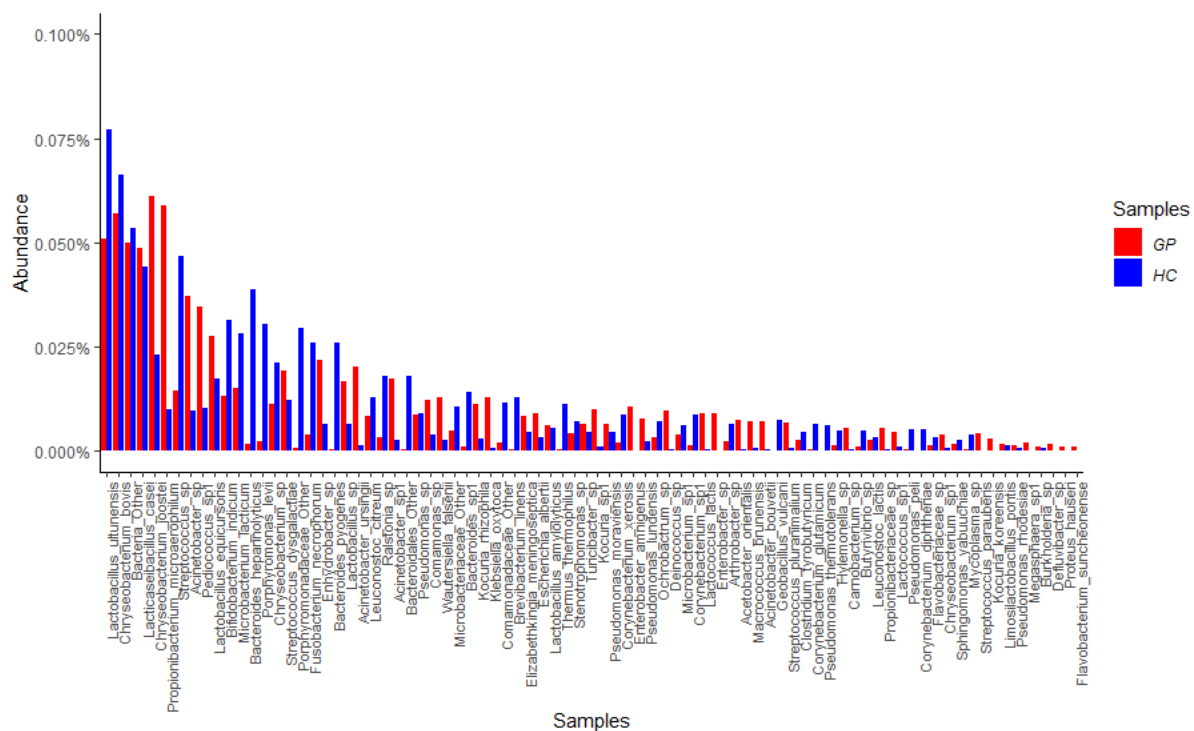

**Figure S1.** Average values of relative abundance of the 82 subdominant taxa retrieved in Grana Padano (GP) samples and similar hard cheeses (HC) samples.
